# Supplementary material for: A sericin/ graphene oxide composite scaffold as a biomimetic extracellular matrix for structural and functional repair of calvarial bone
Source: PubMed Central journal article supplement (PMC6929981; doi:10.7150/thno.39502), 2020-01-01
Supplement: thnov10p0741s1.pdf [file thnov10p0741s1.pdf]

## Supporting Information

### A sericin/ graphene oxide composite scaffold as a biomimetic extracellular matrix for structural and functional repair of calvarial bone

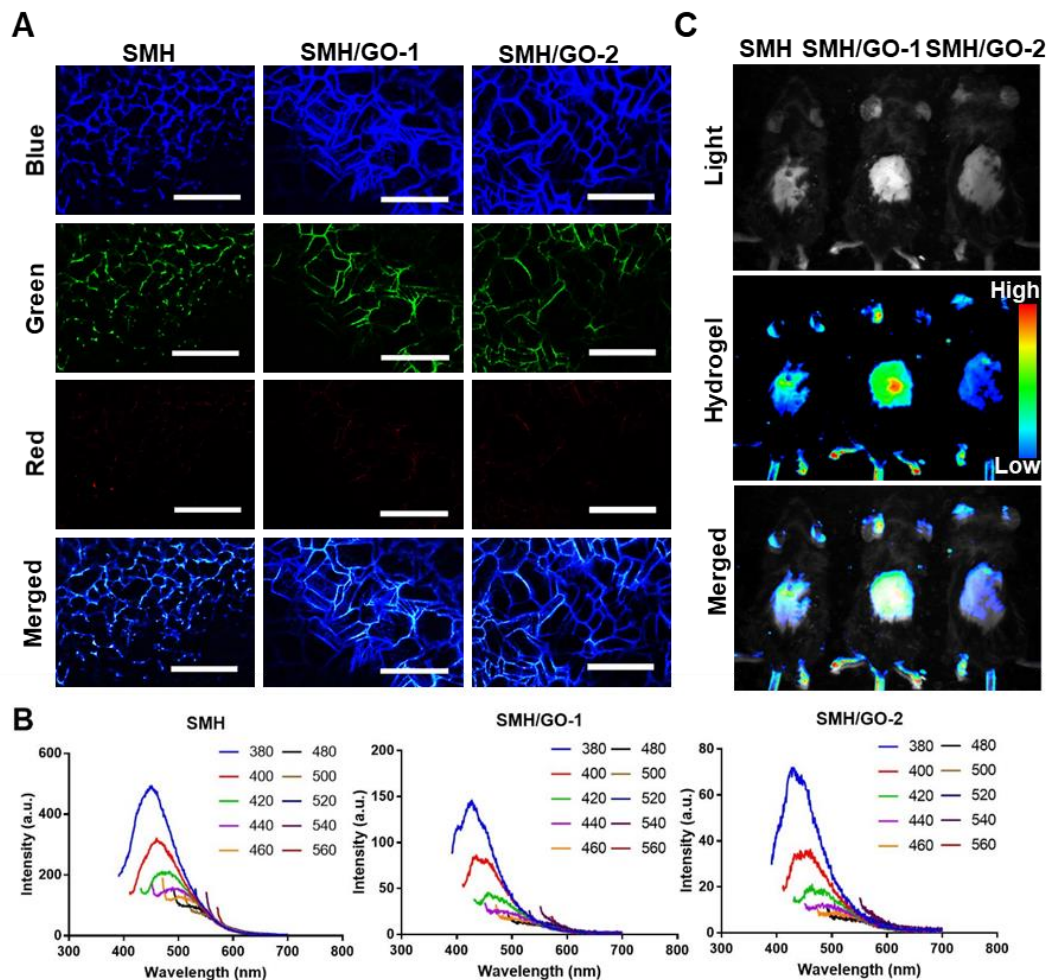

**Figure S1. Photoluminescent property of SMH/GO hydrogels.** (A) The lyophilized SMH, SMH/GO-1 and SMH/GO-2 were observed by confocal laser scanning microscopy under the exciting light with the wavelengths of 405 nm (Blue), 488 nm (Green) and 561 nm (Red). Scale bars, 200  $\mu$ m. (B) The emission spectra of SMH, SMH/GO-1 and SMH/GO-2. (C) *In vivo* light and fluorescence images of SMH/GO hydrogels subcutaneously injected into the dorsal skin of C57BL/6 mice. Each picture was imaged under the excitation wavelength of 430 nm and the emission wavelength of 535 nm.

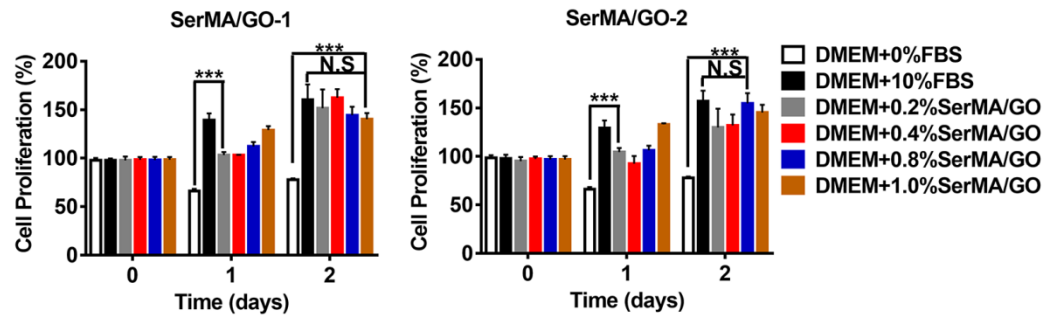

**Figure S2.** The cell proliferation of BMSCs co-cultured with SerMA/GO-1(Left) and SerMA/GO-2 (Right) after 24 and 48 hours. \*\*\* $P < 0.001$ , N.S: not significant. Three samples per group per condition.

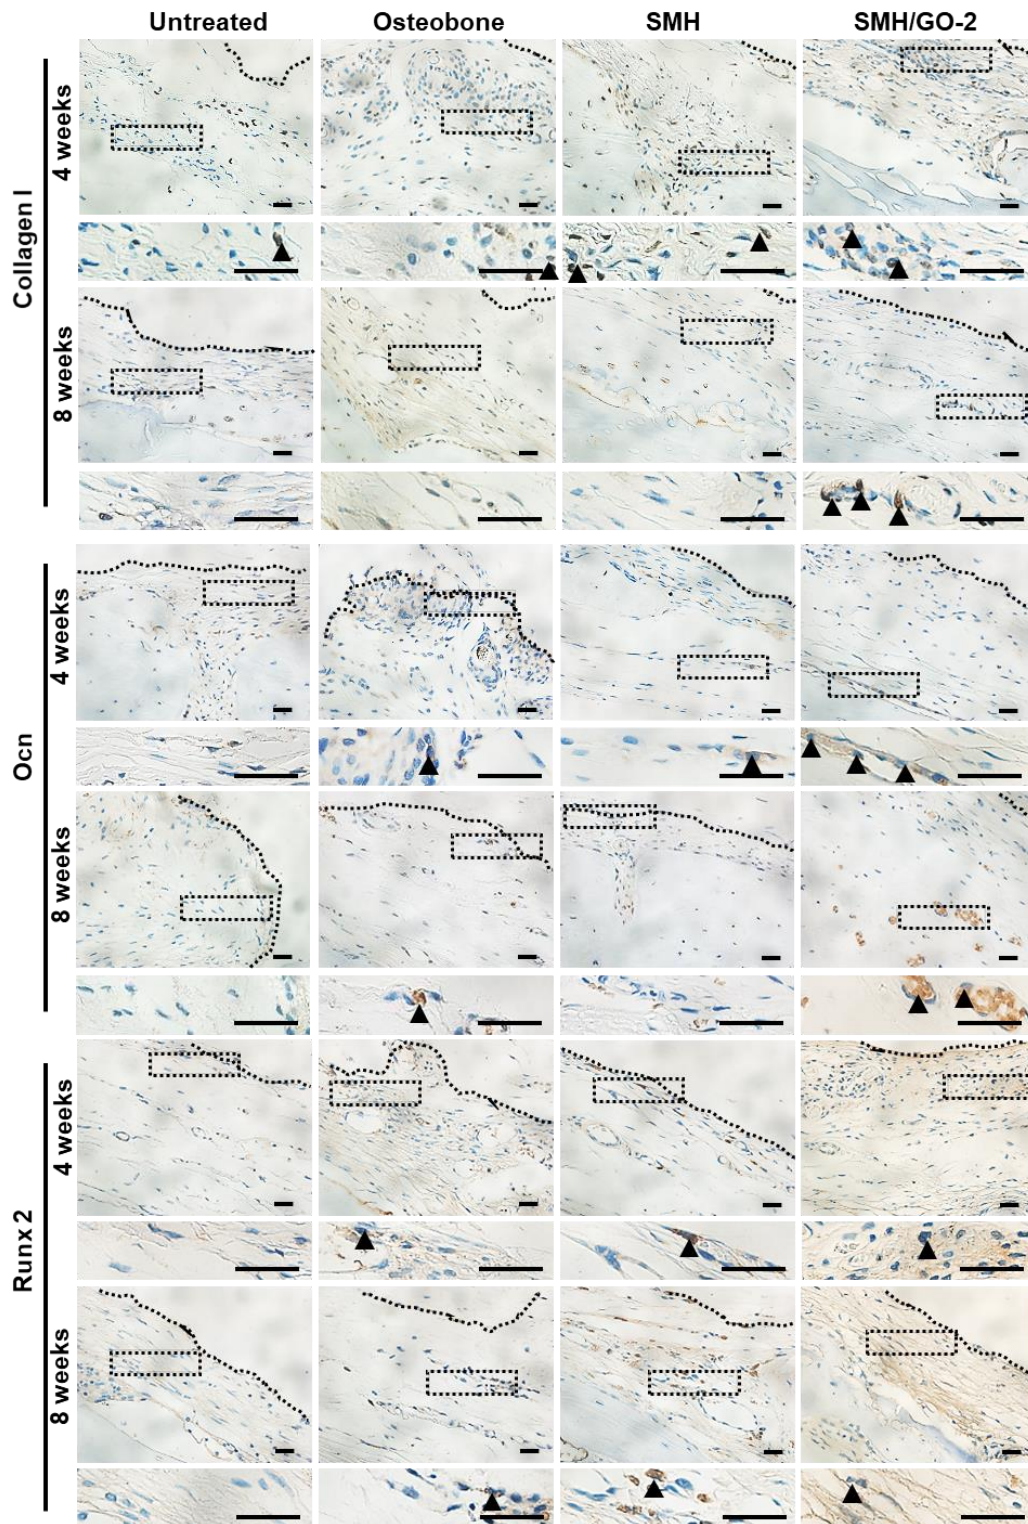

**Figure S3.** The immunohistological staining of Collagen I, Ocn and Runx 2 in wound sites treated by Osteobone, SMH and SMH/GO-2 4 and 8 weeks after treatments. The black dotted boxes in the upper panels were enlarged in the lower panels. The black triangle indicates positive cell.

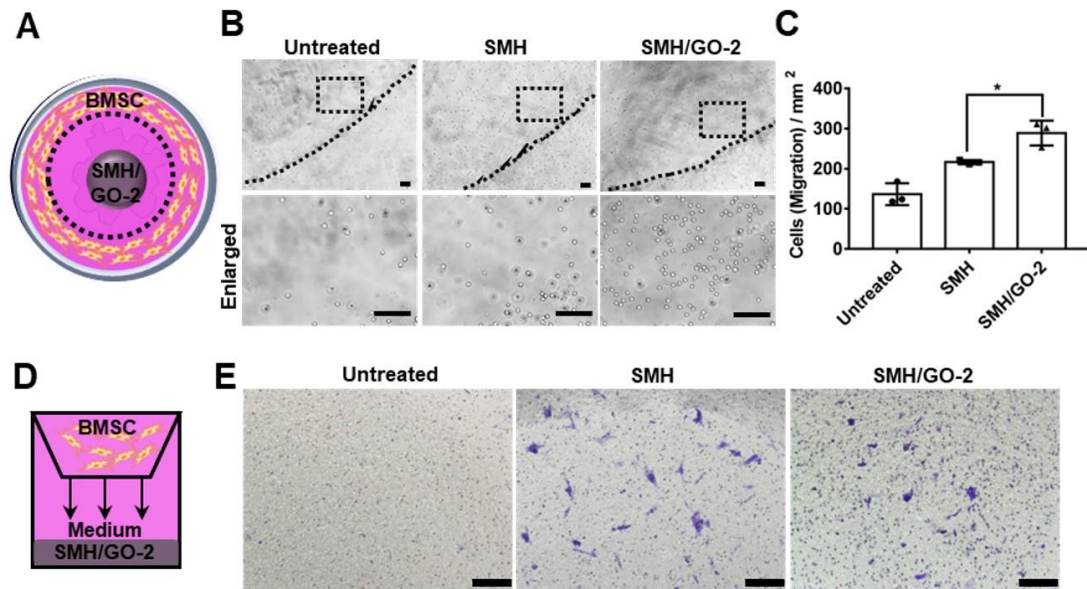

**Figure S4. SMH/GO hydrogels promote BMSCs directional migration *in vitro*.** (A)

Schematics of directed migration assay where BMSCs seeded in the peripheral zone of the dish were co-cultured with SMH/GO-2 or SMH hydrogels that were placed at the center of the dish. (B) Directed migration assay of BMSCs co-cultured with SMH/GO-2 hydrogel or SMH hydrogel. The black dotted boxes in the upper panels were enlarged in the lower panels. The black dotted line indicated boundary of wound closure. Scale bars, 100  $\mu$ m. (C) Quantification of migrated cells number in (B). (D) Schematics of transwell assay of BMSCs co-cultured with SMH/GO-2 or SMH hydrogels. Transwell assay of BMSCs was detected using 24-well Boyden chambers. BMSCs were seeded on the upper chamber of with serum-free IMDM medium, and IMDM medium containing SMH/GO hydrogel was added in the lower chamber. (E) Transwell assay of BMSCs co-cultured with SMH/GO-2 or SMH hydrogel. Migrated BMSCs were stained with crystal violet. \* $P < 0.05$ .  $n = 3$  per group. Three random fields per groups were quantified. Scale bars, 100  $\mu$ m.

**Table S1. The primer sequences of Runx 2, Ocn, Col 1, GAPDH.**

| Gene   | Species    | Primers                              |
|--------|------------|--------------------------------------|
| Runx 2 | Rattus     | Forward 5'-TACCAGCCACCGAGACCAA-3'    |
|        | norvegicus | Reverse 5'-AGAGGCTGTTTGACGCCATAG-3'  |
| Ocn    | Rattus     | Forward 5'-GAGGACCCTCTCTCTGCTCA -3'  |
|        | norvegicus | Reverse 5'- GGTAGCGCCGGAGTCTATTC -3' |
| Col 1  | Rattus     | Forward 5'-GGAGAGAGCATGACCGATGG -3'  |
|        | norvegicus | Reverse 5'-GGGACTTCTTGAGGTTGCCA -3'  |
| GAPDH  | Rattus     | Forward 5'-ATGACTCTACCCACGGCAAG -3'  |
|        | norvegicus | Reverse 5'-TACTCAGCACCAGCATCACC -3'  |

**Table S2 Specific gene FPKM of BMSCs co-cultured with SMH/GO or Untreated in MAPK signaling pathway**

| MAPK signaling pathway |           |                  |              |
|------------------------|-----------|------------------|--------------|
| Number                 | Gene Name | Untreated (FPKM) | SMH/GO(FPKM) |
| 1                      | Il1b      | 1.623052         | 1401.488     |
| 2                      | Cd14      | 38.24301         | 514.6499     |
| 3                      | Met       | 5.165546         | 32.29564     |
| 4                      | Rac2      | 33.33944         | 134.1875     |
| 5                      | Pla2g4a   | 10.40573         | 40.57306     |
| 6                      | Il1a      | 3.661276         | 526.4951     |
| 7                      | Ereg      | 0.362251         | 13.45537     |
| 8                      | Rps6ka5   | 2.577283         | 11.7867      |
| 9                      | Nfkb2     | 16.27138         | 50.78408     |
| 10                     | Igf1      | 17.90147         | 18.347       |
| 11                     | Ngf       | 21.08205         | 66.50096     |
| 12                     | Flnc      | 41.40038         | 17.77473     |
| 13                     | Map3K8    | 3.158313         | 11.2547      |
| 14                     | Relb      | 8.087848         | 30.46607     |
| 15                     | Dusp2     | 1.175138         | 11.91962     |
| 16                     | Tgfbr1    | 26.76477         | 10.97179     |
| 17                     | Rapgef2   | 4.943177         | 13.93539     |
| 18                     | ErbB3     | 2.848232         | 0.523095     |
| 19                     | Stmn1     | 59.17106         | 23.44199     |
| 20                     | Angpt1    | 6.82256          | 27.52228     |
| 21                     | Mknk2     | 56.97755         | 28.70072     |
| 22                     | Mras      | 14.9577          | 28.22213     |
| 23                     | Mapkapk2  | 61.2313          | 98.86482     |
| 24                     | Cacna1h   | 0.546154         | 1.872956     |
| 25                     | Map2k1    | 103.5989         | 155.1018     |
| 26                     | Egfr      | 5.861101         | 13.33473     |
| 27                     | Vegfa     | 109.2931         | 218.2653     |
| 28                     | Rasgrp3   | 19.22667         | 9.852694     |
| 29                     | Pak1      | 55.90118         | 81.44923     |
| 30                     | Cdc25b    | 12.11904         | 5.970186     |
| 31                     | Mknk1     | 34.35821         | 59.34401     |
| 32                     | Dusp16    | 3.953068         | 8.667111     |
| 33                     | Rela      | 24.88723         | 38.2246      |
| 34                     | Mef2c     | 3.581978         | 1.783404     |
| 35                     | Rras2     | 43.02837         | 28.17038     |
| 36                     | Vegfb     | 20.16496         | 11.37763     |
| 37                     | Cacnb3    | 14.07856         | 23.23441     |
| 38                     | Tgfbr2    | 82.42284         | 60.45992     |

|    |          |          |          |
|----|----------|----------|----------|
| 39 | Rps6ka1  | 5.174784 | 9.937583 |
| 40 | Vegfc    | 13.90169 | 21.86858 |
| 41 | Map4k2   | 3.729266 | 6.347533 |
| 42 | Hgf      | 4.438248 | 7.544394 |
| 43 | Ppp3ca   | 20.22594 | 29.40477 |
| 44 | Pdgfc    | 15.39575 | 9.111755 |
| 45 | Pdgfb    | 2.032077 | 0.493755 |
| 46 | Tnfrsf1a | 66.23854 | 88.22742 |
| 47 | Il1rap   | 4.642188 | 7.812615 |
| 48 | Dusp1    | 134.577  | 87.26142 |
| 49 | Arrb1    | 13.55738 | 8.641113 |
| 50 | Tp53     | 52.76163 | 74.01943 |
| 51 | Traf2    | 12.6105  | 18.99356 |
| 52 | Myd88    | 20.45117 | 29.61648 |
| 53 | Rps6ka2  | 7.379798 | 4.659369 |
| 54 | Rasgrp4  | 3.286303 | 1.244377 |
| 55 | Kitlg    | 35.9552  | 26.27229 |
| 56 | Tek      | 0.203608 | 0.743617 |
| 57 | Tgfb1    | 87.00561 | 135.1933 |
| 58 | Map4k4   | 60.78542 | 80.40064 |
| 59 | Rras     | 152.9111 | 212.695  |
| 60 | Rasgrp1  | 0.683354 | 4.381518 |
| 61 | Rps6ka3  | 9.805472 | 7.220897 |
| 62 | Map3k5   | 4.476667 | 2.818381 |
| 63 | Rap1b    | 259.2907 | 340.0331 |
| 64 | Prkca    | 5.558527 | 3.680107 |
| 65 | Map3k6   | 3.680808 | 5.511203 |
| 66 | Mapkapk3 | 16.61232 | 24.8215  |
| 67 | Lamtor3  | 39.26541 | 28.9596  |
| 68 | Il1r1    | 27.38465 | 59.78841 |
| 69 | Ddit3    | 56.42943 | 38.85496 |
| 70 | Flnb     | 17.59144 | 13.54834 |
| 71 | Gna12    | 58.9272  | 71.67332 |
| 72 | Gadd45b  | 37.01894 | 55.87612 |
| 73 | Map3k4   | 2.99085  | 1.919564 |
| 74 | Jun      | 37.94804 | 27.64929 |
| 75 | Tgfb3    | 340.8784 | 119.8837 |
| 76 | Mapk1    | 67.93591 | 54.66568 |
| 77 | Traf6    | 3.578344 | 5.509127 |
| 78 | Dusp5    | 16.60769 | 12.16619 |
| 79 | Vegfd    | 4.527468 | 6.764722 |
| 80 | Mapk14   | 29.09758 | 23.62747 |
| 81 | Cacng4   | 0.462309 | 0.10805  |
| 82 | Rasa1    | 27.28143 | 22.35787 |

|     |              |          |          |
|-----|--------------|----------|----------|
| 83  | Dusp7        | 14.32514 | 18.5212  |
| 84  | LOC108348108 | 3.059511 | 1.524943 |
| 85  | Rasgrp2      | 0.793867 | 0.22073  |
| 86  | Fgf7         | 322.7311 | 407.612  |
| 87  | Map4k1       | 2.645767 | 1.557025 |
| 88  | Casp3        | 15.3033  | 19.67364 |
| 89  | Nr4a1        | 29.59364 | 22.0345  |
| 90  | Ptpn7        | 6.359351 | 4.595449 |
| 91  | Epha2        | 9.561579 | 12.64939 |
| 92  | Efna5        | 10.15423 | 15.582   |
| 93  | Ntrk1        | 0.258569 | 0.684931 |
| 94  | Araf         | 29.28109 | 35.48454 |
| 95  | Flt1         | 0.077195 | 0.247406 |
| 96  | Dusp3        | 24.87252 | 21.11105 |
| 97  | Cdc42        | 284.8574 | 329.0382 |
| 98  | Irak1        | 39.53599 | 33.66571 |
| 99  | Dusp4        | 2.448055 | 1.618515 |
| 100 | Cacng7       | 0.037575 | 0.319936 |
| 101 | Pdgfrb       | 112.6887 | 98.66304 |
| 102 | Dusp6        | 20.96846 | 25.63562 |
| 103 | Atf4         | 139.4125 | 159.1158 |
| 104 | Map3k1       | 0.647811 | 0.314476 |
| 105 | Kras         | 18.25147 | 14.36808 |
| 106 | Rps6ka4      | 27.96639 | 23.04429 |
| 107 | Ppm1a        | 26.42435 | 31.38105 |
| 108 | Cacna2d1     | 8.107261 | 10.21977 |
| 109 | Map3k20      | 24.46194 | 20.16484 |
| 110 | Pla2g4d      | 0.146171 | 0.486348 |
| 111 | LOC103694380 | 0.143452 | 0.83006  |
| 112 | Hspb1        | 353.8885 | 203.5138 |
| 113 | Ppp3r1       | 38.17381 | 43.49968 |
| 114 | Angpt4       | 22.73993 | 18.84271 |
| 115 | Mapk3        | 76.51053 | 89.31088 |
| 116 | Rac1         | 123.4613 | 138.122  |

---

# FPKM: Fragments Per Kilobase of transcript per Million fragments mapped



**Table S3 Specific gene FPKM of BMSCs co-cultured with SMH/GO or Untreated in TNF signaling pathway**

| TNF signaling pathway |           |                  |              |
|-----------------------|-----------|------------------|--------------|
| Number                | Gene Name | Untreated (FPKM) | SMH/GO(FPKM) |
| 1                     | Il1b      | 1.623052         | 1401.488     |
| 2                     | Ccl12     | 21.16123         | 553.2132     |
| 3                     | Mmp9      | 11.70843         | 154.1042     |
| 4                     | Ptgs2     | 56.17974         | 460.6985     |
| 5                     | Tnfaip3   | 2.801209         | 26.95747     |
| 6                     | Creb3l1   | 19.1176          | 89.07108     |
| 7                     | Birc3     | 2.746906         | 19.0014      |
| 8                     | Nod2      | 0.831215         | 8.9331       |
| 9                     | Tnfrsf1b  | 10.2201          | 54.22913     |
| 10                    | Cflar     | 14.91256         | 56.11503     |
| 11                    | Rps6ka5   | 2.577283         | 11.7867      |
| 12                    | Ccl2      | 775.2646         | 3705.978     |
| 13                    | Nfkb1     | 18.99323         | 53.76932     |
| 14                    | Icam1     | 52.80183         | 128.9413     |
| 15                    | Cxcl2     | 15.19772         | 655.1574     |
| 16                    | Cxcl3     | 107.857          | 1726.01      |
| 17                    | Csf2      | 1.05409          | 32.93001     |
| 18                    | Map3k8    | 3.158313         | 11.2547      |
| 19                    | Mmp14     | 255.0856         | 547.3885     |
| 20                    | Traf1     | 1.485267         | 7.088363     |
| 21                    | Socs3     | 31.08256         | 192.4548     |
| 22                    | Il6       | 41.1276          | 381.4086     |
| 23                    | Map2k1    | 103.5989         | 155.1018     |
| 24                    | Lif       | 8.625385         | 59.89222     |
| 25                    | Mmp3      | 82.69355         | 659.1337     |
| 26                    | Jag1      | 5.827515         | 13.60523     |
| 27                    | Cxcl1     | 363.9489         | 1743.355     |
| 28                    | Ccl20     | 32.31175         | 838.0274     |
| 29                    | Rela      | 24.88723         | 38.2246      |
| 30                    | Birc2     | 27.76928         | 18.87565     |
| 31                    | Creb5     | 0.530428         | 1.729823     |
| 32                    | Pik3cb    | 5.225934         | 8.911469     |
| 33                    | Traf3     | 10.5922          | 14.71402     |
| 34                    | Tnfrsf1a  | 66.23854         | 88.22742     |
| 35                    | Bcl3      | 6.345241         | 26.49079     |
| 36                    | Traf2     | 12.6105          | 18.99356     |
| 37                    | Ifi47     | 7.53558          | 4.051224     |
| 38                    | Map3k5    | 4.476667         | 2.818381     |

|    |              |          |          |
|----|--------------|----------|----------|
| 39 | Casp8        | 6.68462  | 10.28108 |
| 40 | Junb         | 90.5224  | 206.4717 |
| 41 | Cxcl10       | 1.852138 | 0.364506 |
| 42 | Cebpb        | 99.43952 | 224.4731 |
| 43 | Il15         | 7.793793 | 15.20702 |
| 44 | Jun          | 37.94804 | 27.64929 |
| 45 | Ccl5         | 11.33922 | 41.83816 |
| 46 | Mapk1        | 67.93591 | 54.66568 |
| 47 | Il18r1       | 0.331079 | 1.022176 |
| 48 | Pik3r3       | 7.46865  | 4.703522 |
| 49 | Mapk14       | 29.09758 | 23.62747 |
| 50 | Creb3l2      | 22.18448 | 17.78673 |
| 51 | Pik3ca       | 7.449071 | 9.307282 |
| 52 | Casp3        | 15.3033  | 19.67364 |
| 53 | Ripk1        | 12.22232 | 14.92071 |
| 54 | Atf4         | 139.4125 | 159.1158 |
| 55 | Rps6ka4      | 27.96639 | 23.04429 |
| 56 | Atf6b        | 41.4469  | 49.12532 |
| 57 | LOC103694380 | 0.143452 | 0.83006  |
| 58 | Mapk3        | 76.51053 | 89.31088 |
| 59 | Irf1         | 7.313214 | 9.409684 |

---

**Table S4 Specific gene FPKM of BMSCs co-cultured with SMH/GO or Untreated in chemokine signaling pathway**

| Chemokine signaling pathway |           |                  |              |
|-----------------------------|-----------|------------------|--------------|
| Number                      | Gene Name | Untreated (FPKM) | SMH/GO(FPKM) |
| 1                           | Ccl3      | 8.332658         | 657.1035     |
| 2                           | Ccl4      | 7.360073         | 658.7879     |
| 3                           | Ccl12     | 21.16123         | 553.2132     |
| 4                           | Ccl9      | 4.82618          | 157.4049     |
| 5                           | Nfkbia    | 18.3863          | 157.3239     |
| 6                           | Cxcl16    | 24.9772          | 123.0666     |
| 7                           | Jak2      | 16.82202         | 66.58971     |
| 8                           | Rac2      | 33.33944         | 134.1875     |
| 9                           | Ccl2      | 775.2646         | 3705.978     |
| 10                          | Gng12     | 117.78           | 290.8318     |
| 11                          | Nfkb1     | 18.99323         | 53.76932     |
| 12                          | Cxcl2     | 153.345          | 192.8504     |
| 13                          | Ptk2b     | 14.12786         | 35.08393     |
| 14                          | Ccl7      | 621.3104         | 2311.426     |
| 15                          | Cxcl3     | 107.857          | 1726.01      |
| 16                          | Gngt2     | 87.00516         | 27.25305     |
| 17                          | Stat4     | 14.98958         | 6.81881      |
| 18                          | Fgr       | 10.53057         | 24.45835     |
| 19                          | Gng8      | 17.96435         | 50.58306     |
| 20                          | Hck       | 33.1809          | 70.7582      |
| 21                          | Ccl6      | 6.202822         | 244.713      |
| 22                          | Ncf1      | 42.86032         | 86.82888     |
| 23                          | Nfkbib    | 9.155127         | 25.92058     |
| 24                          | Pik3cg    | 5.106987         | 12.65649     |
| 25                          | Pik3r5    | 8.159415         | 18.09959     |
| 26                          | Plcb2     | 6.77266          | 2.800457     |
| 27                          | Map2k1    | 103.5989         | 155.1018     |
| 28                          | Adcy7     | 21.79331         | 36.89955     |
| 29                          | Lyn       | 26.06949         | 44.98457     |
| 30                          | Pak1      | 55.90118         | 81.44923     |
| 31                          | Prex1     | 10.86415         | 19.77547     |
| 32                          | Cxcl1     | 363.9489         | 1743.355     |
| 33                          | Src       | 23.78335         | 35.33737     |
| 34                          | Pf4       | 1528.487         | 2652.949     |
| 35                          | Ccl20     | 32.31175         | 838.0274     |
| 36                          | Rela      | 24.88723         | 38.2246      |
| 37                          | Prked     | 23.52993         | 34.90354     |
| 38                          | Pxn       | 23.72752         | 16.26606     |

|    |              |          |          |
|----|--------------|----------|----------|
| 39 | Pik3cb       | 12.85879 | 11.15998 |
| 40 | Stat3        | 69.22348 | 90.36574 |
| 41 | Cxcr4        | 19.08462 | 29.37529 |
| 42 | Arrb1        | 13.55738 | 8.641113 |
| 43 | Shc1         | 82.813   | 106.674  |
| 44 | Tiam1        | 4.697278 | 7.27088  |
| 45 | Cxcl6        | 157.3477 | 750.4836 |
| 46 | Adcy8        | 1.350699 | 3.516613 |
| 47 | Adcy2        | 1.674548 | 3.534729 |
| 48 | Rap1b        | 259.2907 | 340.0331 |
| 49 | Rock2        | 49.99281 | 38.40963 |
| 50 | Ccr5         | 8.691501 | 4.481508 |
| 51 | Cxcl10       | 1.852138 | 0.364506 |
| 52 | Vav2         | 8.972782 | 6.65675  |
| 53 | Gnb5         | 15.23428 | 21.96619 |
| 54 | Gng10        | 143.397  | 173.7987 |
| 55 | Plcb4        | 10.56106 | 7.889541 |
| 56 | Stat2        | 13.73429 | 17.58303 |
| 57 | Ccl5         | 11.33922 | 41.83816 |
| 58 | Mapk1        | 67.93591 | 54.66568 |
| 59 | Grk6         | 13.101   | 10.26047 |
| 60 | Pik3r3       | 7.46865  | 4.703522 |
| 61 | Ppbp         | 0.277834 | 1.602305 |
| 62 | Adcy4        | 14.54621 | 10.86936 |
| 63 | Pik3r6       | 0.32567  | 0.030944 |
| 64 | Rasgrp2      | 0.793867 | 0.22073  |
| 65 | Adcy9        | 2.388793 | 1.468331 |
| 66 | Gng2         | 8.394958 | 11.15021 |
| 67 | Pik3ca       | 7.449071 | 9.307282 |
| 68 | Elmo1        | 4.113742 | 2.516399 |
| 69 | Cdc42        | 284.8574 | 329.0382 |
| 70 | Gsk3b        | 28.82657 | 34.82599 |
| 71 | Kras         | 18.25147 | 14.36808 |
| 72 | LOC108349548 | 95.29955 | 81.68275 |
| 73 | Cxcl11       | 1.191536 | 2.222097 |
| 74 | Cxcl14       | 8.859395 | 11.53209 |
| 75 | Cx3cr1       | 0.206636 | 0        |
| 76 | Gnai1        | 26.33932 | 21.59448 |
| 77 | Gng4         | 0.094157 | 0.331537 |
| 78 | Mapk3        | 76.51053 | 89.31088 |
| 79 | Rac1         | 123.4613 | 138.122  |

---
